# Supplementary material
Source: publisher figshare collection journal article supplement (https://rs.figshare.com/ndownloader/files/15572609)
Supplement: Supplementary file 1 [file 15572609]

### Tail loss and telomeres: consequences of large-scale tissue regeneration in a terrestrial ectotherm. 
### L. J. Fitzpatrick, M. Olsson, L. M. Parsley, A. Pauliny, G. M. While and E. Wapstra.
#############################################################################################################
library(ggplot2)
library(lmerTest)
library(corrplot)
library(lsmeans)
library(emmeans)
library(Rmisc)
library(nlme)
library(cowplot)

#############################################################################################################
TL<-read.csv("Fitzpatrick et al data.csv")
head(TL)
TL$Time <- as.factor(TL$Time) 
TL$Treatment <- as.factor(TL$Treatment) 
TL$Lizard.ID <- as.factor(TL$Lizard.ID)
TL$logROS <- log(TL$ROS)
TL$RTL <- TL$RTL.Blood

#(code below for figures only)
TL$ROS1 <- (TL$ROS)/1000
TL$ROS.Change1 <- (TL$ROS.Change)/1000
TL$changetypeRTL[TL$RTL.Change.Blood<0]<- 'Negative'
TL$changetypeRTL[TL$RTL.Change.Blood>0]<- 'Positive'
TL$changetypeRTL <- TL$changetypeRTL[match(TL$Lizard.ID, TL$Lizard.ID)]
TL$changetypeROS[TL$ROS.Change<0]<- 'Negative'
TL$changetypeROS[TL$ROS.Change>0]<- 'Positive'
TL$changetypeROS <- TL$changetypeROS[match(TL$Lizard.ID, TL$Lizard.ID)]

############################################################################################
###                                RTL MODEL WITH ROS                                   ####
 
#Look at relationship between ROS.Change and RTL.Change.Blood
ggplot(TL, aes(ROS.Change, RTL.Change.Blood, color = factor(Treatment))) +
  geom_point()

#spaghetti plot RTL
fig1a <- ggplot(TL, aes(Time, RTL)) + geom_line(aes(group = Lizard.ID)) + facet_wrap(~ Treatment) +
  geom_point()
fig1a

#potential outliers could be driving the results H2, H4 (see outliers section below)

lm1.1 = gls(RTL.Change.Blood ~ Treatment + ROS.Change, 
            data=TL[seq(1,38,2),], 
            weights = varIdent(form = ~1|Treatment), 
            method="ML")

summary(lm1.1)
#Generalized least squares fit by maximum likelihood
#Model: RTL.Change.Blood ~ Treatment + ROS.Change 
#Data: TL[seq(1, 38, 2), ] 
#AIC      BIC    logLik
#42.2931 47.01529 -16.14655

#Variance function:
#  Structure: Different standard deviations per stratum
#Formula: ~1 | Treatment 
#Parameter estimates:
#  B        A 
#1.000000 1.898699 

#Coefficients:
#             Value      Std.Error    t-value     p-value
#(Intercept) -0.8251676  0.30522799   -2.703447   0.0157*
#TreatmentB   1.1183637  0.31273720   3.576050    0.0025*
#ROS.Change  -0.0002247  0.00003803   -5.907767   0.0000

#Correlation: 
#           (Intr) TrtmnB
#TreatmentB -0.860       
#ROS.Change  0.500 -0.257

#Standardized residuals:
#  Min         Q1        Med         Q3        Max 
#-1.9084488 -0.6891454 -0.1801062  0.7383180  1.6695244 

#Residual standard error: 0.4039042 
#Degrees of freedom: 19 total; 16 residual

vcov(lm1.1)
#             (Intercept)    TreatmentB    ROS.Change
#(Intercept)  9.316413e-02 -8.209533e-02  5.807922e-06
#TreatmentB  -8.209533e-02  9.780456e-02 -3.051720e-06
#ROS.Change   5.807922e-06 -3.051720e-06  1.446210e-09

intervals(lm1.1)
#Approximate 95% confidence intervals
#Coefficients:
#                lower          est.           upper
#(Intercept) -1.4722220236  -0.8251675813  -0.1781131391
#TreatmentB   0.4553904778   1.1183637240   1.7813369701
#ROS.Change  -0.0003052849  -0.0002246669  -0.0001440488

#Holding the change in ROS fixed, the effect of 
#treatment B is significantly larger 
#than treatment A with a confidence interval
#for the difference in the means of B-A of (1.12, 1.78).
#For every increase of 1000 in the change in ROS, the change
#in mean RTL decreases with a 95% CI of (-0.225, -0.144).

lm1.1.emmo.Treatment <- emmeans::emmeans(lm1.1, ~Treatment)

lm1.1.emmo.Treatment
#Treatment     emmean        SE df      lower.CL       upper.CL
#A             -0.1474788    0.2669918  16 -0.7134762  0.4185186
#B              0.9708849    0.1526730  16  0.6472326  1.2945373

#The estimated marginal mean at the average value of ROS.Change has 
# CI (-0.721, 0.426) for treatment A
# and (0.625, 1.316) for treatment B. Therefore, there is evidence of
# a positive effect of treatment B on the change in blood RTL, but there 
# is no evidence of an effect for treatment A.

#You may also estimate marginal means at specified covariates values, e.g.
emmeans::emmeans(lm1.1, ~Treatment, at = list(ROS.Change = 0))

summary(pairs(lm1.1.emmo.Treatment), infer=c(TRUE,TRUE))
#The estimated marginal mean difference between treatment B and A (B-A)
#is positive with CI (0.463, 1.77). (This is different from the result
#above because it is the mean predicted response for that treatment 
#at a specific value of the covariate, which includes the ID effect).

#Look at residuals separately for each group with unequal variance
plot(fitted(lm1.1)[1:9], residuals(lm1.1)[1:9], col="blue", xlim=c(-1,2.5), ylim=c(-1,1.5))
points(fitted(lm1.1)[10:19], residuals(lm1.1)[10:19], col="darkgreen")
points(c(-1,2.5), c(0,0), type="l")
#looks good (green is A, blue is B)

qqnorm(residuals(lm1.1)[1:9])
qqline(residuals(lm1.1)[1:9], datax = FALSE, distribution = qnorm,
       probs = c(0.25, 0.75))
qqnorm(residuals(lm1.1)[10:19])
qqline(residuals(lm1.1)[10:19], datax = FALSE, distribution = qnorm,
       probs = c(0.25, 0.75))
#looks good


####  OUTLIERS  ###
#check that results are not driven by outliers H2 and H4 by excluding these and running again
TL.x <- subset(TL, RTL.Change.Blood < 3)
TL.x <- subset(TL.x, RTL.Change.Blood > -1.3)

lm1.11 = gls(RTL.Change.Blood ~ Treatment + ROS.Change, 
             data=TL.x[seq(1,17,2),],
             weights = varIdent(form = ~1|Treatment), 
             method="ML")

summary(lm1.11)
#treatment and ROS both still significant

vcov(lm1.11)

intervals(lm1.11)

lm1.11.emmo.Treatment <- emmeans::emmeans(lm1.1, ~Treatment)

lm1.11.emmo.Treatment
#The estimated marginal mean at the average value of ROS.Change has 
# CI (-0.71, 0.42) for treatment A
# and (0.65, 1.3) for treatment B. Therefore, there is evidence of
# a positive effect of treatment B on the change in blood RTL, but there 
# is no evidence of an effect for treatment A.


############################################################################################
###                                   ROS MODEL                                          ### 

#spaghetti plot ROS
fig2a <- ggplot(TL, aes(Time, ROS)) + geom_line(aes(group = Lizard.ID)) + facet_wrap(~ Treatment) +
  geom_point()
fig2a

#Variability on day 0 is larger than on day 60 

figS2.1 <- ggplot(TL, aes(Time, logROS)) + geom_line(aes(group = Lizard.ID)) + facet_wrap(~ Treatment) +
  geom_point()
figS2.1
#taking the log does not solve the heterogeneity problem


lm2.1 = lme(fixed= logROS ~ Treatment*Time,
            data=TL, 
            random = ~ 1|Lizard.ID,
            weights = varIdent(form = ~1|Treatment*Time), 
            method="ML")

summary(lm2.1)

vcov(lm2.1)

intervals(lm2.1)
#The 95% CI for the interaction effect is given by (0.06, 1.35)

lm2.1.emmo.TreatmentTime <- emmeans::emmeans(lm2.1, ~Treatment*Time)

lm2.1.emmo.TreatmentTime

summary(pairs(lm2.1.emmo.TreatmentTime, adjust="Tukey"), infer=c(TRUE,TRUE))

contrast(lm2.1.emmo.TreatmentTime, interaction = c("consec", "consec"))

confint(contrast(lm2.1.emmo.TreatmentTime, interaction = c("consec", "consec")))

#Look at residuals separately for each group with unequal variance
plot(fitted(lm2.1)[seq(1,18,2)], residuals(lm2.1)[seq(1,18,2)], col="blue", xlim=c(7.2,9.2), ylim=c(-2,2))
points(fitted(lm2.1)[seq(2,18,2)], residuals(lm2.1)[seq(2,18,2)], col="red")
points(fitted(lm2.1)[seq(19,38,2)], residuals(lm2.1)[seq(19,38,2)], col="darkgreen")
points(fitted(lm2.1)[seq(20,38,2)], residuals(lm2.1)[seq(20,38,2)], col="purple")
points(c(7.2,9.2), c(0,0), type="l")
#B1:blue B2:red A1:green A2:purple 

qqnorm(residuals(lm2.1)[seq(1,18,2)])
qqline(residuals(lm2.1)[seq(1,18,2)], datax = FALSE, distribution = qnorm,
       probs = c(0.25, 0.75))

qqnorm(residuals(lm2.1)[seq(2,18,2)])
qqline(residuals(lm2.1)[seq(2,18,2)], datax = FALSE, distribution = qnorm,
       probs = c(0.25, 0.75))

qqnorm(residuals(lm2.1)[seq(19,38,2)])
qqline(residuals(lm2.1)[seq(19,38,2)], datax = FALSE, distribution = qnorm,
       probs = c(0.25, 0.75))

qqnorm(residuals(lm2.1)[seq(20,38,2)])
qqline(residuals(lm2.1)[seq(20,38,2)], datax = FALSE, distribution = qnorm,
       probs = c(0.25, 0.75))


############################################################################################
###                          CORRELATION OF ROS AND RTL                                  ### 
# Correlation of ROS and RTL in treatment groups separately

TL.A <- subset(TL, Treatment == "A")
TL.B <- subset(TL, Treatment == "B")

#treatment group A
cor.test(TL.A$ROS.Change,TL.A$RTL.Change.Blood, method = "pearson", conf.level = 0.95)
plot(TL.A$ROS.Change,TL.A$RTL.Change.Blood)

#Pearson's product-moment correlation:  t = -1.4472, df = 8, p-value = 0.1859
#95 percent confidence interval:   -0.8432788  0.2441451
#sample estimates:  R = -0.45 (95% CI: -0.84,-0.24)

#treatment group B
cor.test(TL.B$ROS.Change,TL.B$RTL.Change.Blood, method = "pearson", conf.level = 0.95)
plot(TL.B$ROS.Change,TL.B$RTL.Change.Blood)

#Pearson's product-moment correlation:  t = -5.6012, df = 7, p-value = 0.0008149
#95 percent confidence interval:   -0.9798963 -0.6009576
#sample estimates:  R = -0.90 (95% CI: -0.98,-0.61)

#H4 ia an outlier - driving the result? remove and see if result still holds
TL.B1 <- subset(TL.B, RTL.Change.Blood < 3)

cor.test(TL.B1$ROS.Change,TL.B1$RTL.Change.Blood, method = "pearson", conf.level = 0.95)
plot(TL.B1$ROS.Change,TL.B1$RTL.Change.Blood)

#Pearson's product-moment correlation:  t = -3.0598, df = 6, p-value = 0.02223
#95 percent confidence interval:   -0.9582131 -0.1689221
#sample estimates:  R = -0.78 (95% CI: -0.96,-0.17)

#still the same direction and fairly strong, so result is not driven solely by outlier. 


############################################################################################
###                                      FIGURES                                         ###
############################################################################################
#FIGURE 1: RTL & ROS

Fig1.1 <- ggplot(TL.A, aes(x=Time, y=RTL, color=changetypeRTL)) + geom_line(aes(group = Lizard.ID, color=changetypeRTL)) + geom_point(size=0.8) +
  labs(x=NULL,y="RTL") + ggtitle("Regenerating") +
  theme(axis.text=element_text(size=14), axis.title=element_text(size=14,face="bold")) + 
  scale_x_discrete(breaks=c("1","2"),labels=c("Day 0", "Day 60"))+
  scale_y_continuous(breaks=seq(0,5,1), limits=c(1.5, 5)) +
  theme(legend.position="none") 
Fig1.1

Fig1.2 <- ggplot(TL.B, aes(x=Time, y=RTL, color=changetypeRTL)) + geom_line(aes(group = Lizard.ID, color=changetypeRTL)) + geom_point(size=0.8) +
  labs(x=NULL,y="") + ggtitle("Control") +
  theme(axis.text=element_text(size=14), axis.title=element_text(size=14,face="bold")) + 
  scale_x_discrete(breaks=c("1","2"),labels=c("Day 0", "Day 60")) +
  scale_y_continuous(breaks=seq(0,5,1), limits=c(1.5, 5)) +
  theme(legend.position="none") 
Fig1.2

Fig1.3 <- ggplot(TL.A, aes(x=Time, y=ROS1, color=changetypeROS)) + geom_line(aes(group = Lizard.ID, color=changetypeROS)) + geom_point(size=0.8) +
  labs(x="Sampling time", y=(bquote('ROS ('* 10^3*')'))) +
  scale_x_discrete(breaks=c("1","2"),labels=c("Day 0", "Day 60")) +
  scale_y_continuous(expand = c(0, 0), limits = c(0, 12.2)) +
  theme(legend.position="none") 
Fig1.3

Fig1.4 <- ggplot(TL.B, aes(x=Time, y=ROS1, color=changetypeROS)) + geom_line(aes(group = Lizard.ID, color=changetypeROS)) + geom_point(size=0.8) +
  labs(x="Sampling time",y=" ") +
  scale_x_discrete(breaks=c("1","2"),labels=c("Day 0", "Day 60")) +
  scale_y_continuous(expand = c(0, 0), limits = c(0, 12.2)) +
  theme(legend.position="none") 
Fig1.4

Figure1 <- plot_grid(Fig1.1, Fig1.2, Fig1.3, Fig1.4, labels = c("a)", "b)", "c)", "d)"), ncol = 2, nrow = 2, align = "v")
Figure1

ggsave("Figure1colour.pdf", width = 15, height = 15, units = "cm", dpi = 600)


Fig1.5 <- ggplot(TL.A, aes(x=Time, y=RTL)) + geom_line(aes(group = Lizard.ID, linetype=changetypeRTL)) +  geom_point(size=0.8) +
  labs(x=NULL,y="RTL") + ggtitle("Regenerating") +
  scale_x_discrete(breaks=c("1","2"),labels=c("Day 0", "Day 60"))+
  scale_y_continuous(breaks=seq(0,5,1), limits=c(1.5, 5)) +
  theme(legend.position="none") 
Fig1.5

Fig1.6 <- ggplot(TL.B, aes(x=Time, y=RTL)) + geom_line(aes(group = Lizard.ID, linetype=changetypeRTL)) + geom_point(size=0.8) +
  labs(x=NULL,y="") + ggtitle("Control") +
  scale_x_discrete(breaks=c("1","2"),labels=c("Day 0", "Day 60")) +
  scale_y_continuous(breaks=seq(0,5,1), limits=c(1.5, 5)) +
  theme(legend.position="none") 
Fig1.6

Fig1.7 <- ggplot(TL.A, aes(x=Time, y=ROS1)) + geom_line(aes(group = Lizard.ID, linetype=changetypeROS)) + geom_point(size=0.8) +
  labs(x="Sampling time",y=(bquote('ROS ('* 10^3*')'))) +
  scale_x_discrete(breaks=c("1","2"),labels=c("Day 0", "Day 60")) +
  scale_y_continuous(expand = c(0, 0), limits = c(0, 12.2)) +
  theme(legend.position="none") 
Fig1.7

Fig1.8 <- ggplot(TL.B, aes(x=Time, y=ROS1)) + geom_line(aes(group = Lizard.ID, linetype=changetypeROS)) + geom_point(size=0.8) +
  labs(x="Sampling time",y=" ") +
  scale_x_discrete(breaks=c("1","2"),labels=c("Day 0", "Day 60")) +
  scale_y_continuous(expand = c(0, 0), limits = c(0, 12.2)) +
  theme(legend.position="none") 
Fig1.8

Figure1a <- plot_grid(Fig1.5, Fig1.6, Fig1.7, Fig1.8, labels = c("a)", "b)", "c)", "d)"), ncol = 2, nrow = 2, align = "v")
Figure1a

ggsave("Figure1.pdf", width = 15, height = 15, units = "cm", dpi = 600)

##########################################################
# FIGURE 2: Correlation

Fig2 <- ggplot(TL, aes(x = ROS.Change1, y = RTL.Change.Blood)) +      
  geom_point(aes(color=Treatment, size=1.5, shape=Treatment)) +
  geom_smooth(aes(linetype=Treatment, color=Treatment), method="lm", se=FALSE)+
  scale_shape_manual(values=c(19,17)) +
  labs(x=(bquote('Change in ROS ('* 10^3*')')),y="Change in RTL") +
  theme(legend.title=element_blank()) +  
  theme(legend.position="none") +
  scale_x_continuous(breaks=seq(-10,2,2))
  #scale_y_continuous(breaks=seq(6,10,1), limits=c(6, 10))
Fig2

ggsave("Figure2.pdf", width = 15, height = 15, units = "cm", dpi = 600)

Fig2a <- ggplot(TL, aes(x = ROS.Change1, y = RTL.Change.Blood)) +      
  geom_point(aes(size=1.5, shape=Treatment, color=Treatment)) +
  geom_smooth(aes(linetype=Treatment, color=Treatment), method="lm", se=FALSE)+
  scale_color_manual(values = c("black", "grey50")) +
  scale_shape_manual(values=c(19,17)) +
  labs(x=(bquote('Change in ROS ('* 10^3*')')),y="Change in RTL") +
  theme(legend.title=element_blank()) +  
  theme(legend.position="none") +
  scale_x_continuous(breaks=seq(-10,2,2))
Fig2a

ggsave("Figure2greyscale.pdf", width = 15, height = 15, units = "cm", dpi = 600)

################################# 
